# Supplementary material for: An active bubble trap and debubbler for microfluidic systems
Source: Royal Society of Chemistry journal article supplement (doi:10.1039/b807037g), 2008-01-01
Supplement: b807037g.pdf [file b807037g.pdf]

**Supplemental Information:**

Video: Real-time video of the bubble trapping process. The bubble is being trapped in the 10- $\mu$ m diameter valve, and the flow rate is 0.1 mL/hr. Immediately upon bubble trapping the color-changeover is visible, indicating a fluidic connection while bubble is immobilized.
